# Supplementary material
Source: PubMed Central journal article supplement (PMC4282610)
Supplement: NIHMS630766-supplement-304457R2_Acknowledgement_Permission.pdf [file NIHMS630766-supplement-304457R2_Acknowledgement_Permission.pdf]

## Circulation Research

---

**From:** jianmingjiang <jmjiang@genetics.med.harvard.edu>  
**Sent:** Thursday, September 18, 2014 12:33 PM  
**To:** circulation.research@circresearch.com; William Pu  
**Cc:** Zhiqiang Lin  
**Subject:** Re: acknowledgement

Dear Editor of Circulation Research and Bill,

I approve my name mentioned in the the acknowledgment part.

Jianming Jiang

--

yours,  
Jianming Jiang

**Seidman Laboratory**  
Harvard Medical School  
Department of Genetics  
NRB-room 256  
77 Avenue Louis Pasteur  
Boston, MA 02115  
Tel:(617) 383-4026  
Fax:(617) 432-7832

On Sep 18, 2014, at 11:07 AM, William Pu <[wpu@pulab.org](mailto:wpu@pulab.org)> wrote:

Dear Jianming,

Our manuscript using AAV to knockdown some genes in heart was accepted in principle to Circulation Research. We acknowledged your input in our work in the Acknowledgement section, "We thank Jianming Jiang for sharing with us the protocol of making AAV-shRNA." The journal requires that you approve this mention of your name in the acknowledgements. Can you please send a brief note to [circulation.research@circresearch.com](mailto:circulation.research@circresearch.com) citing manuscript number CIRCRES/2014/304457R1 and indicate that this acknowledgement is ok for you.

Thank you.  
Bill

+++++
