# Supplementary material
Source: PubMed Central journal article supplement (PMC4282610)
Supplement: NIHMS630766-supplement-304457R2_Online_Data_Supplement.pdf [file NIHMS630766-supplement-304457R2_Online_Data_Supplement.pdf]

# ***Pik3cb* links Hippo-YAP and PI3K-AKT signaling pathways to promote cardiomyocyte proliferation and survival**

## **Supplemental Material**

- A. Detailed Materials and Methods
- B. Supplemental References
- C. Online Tables

Online Table I. Antibodies used in this study

Online Table II. YAP Chip-seq in HL1 cardiomyocyte-like cells.

Online Table III. Primers and DNA oligo sequences used in this study.

Online Table IV. Genes differentially expressed in YAP LOF and YAP GOF and integration with YAP chromatin occupancy.

- D. Supplemental Figures

Online Figure I. PIK3CB protein levels in normal postnatal mouse heart

Online Figure II. YAP does not interact with STAT or ETS at the *Pik3cb* enhancer. Related to Figs. 1 and 2.

Online Figure III. AAV9-mediated overexpression of YAP. Related to Fig. 3.

Online Figure IV. *Pik3cb* gain-of-function in adult cardiomyocyte proliferation in the context of myocardial infarction

Online Figure V. *Pik3cb* in vivo knockdown with shRNA.

## **A. Detailed Materials and Methods.**

### **Mice**

*Yap*<sup>fl/fl</sup><sup>1</sup>, TNT-Cre<sup>2</sup>, and MHC $\alpha$ -Cre<sup>3</sup> alleles were previously described. 5-ethynyl-2'deoxyuridine (EdU) was administered at 5  $\mu$ g/g bodyweight IP. Echocardiography was performed on a VisualSonics Vevo 2100 with Vevostrain software. To induce MI, mice aged 8 weeks were subjected to LAD ligation as described previously.<sup>4</sup>

### **Cell culture**

4-day-old rat pups were used for cardiomyocyte isolation. Neonatal rat ventricular myocytes (NRVMs) were isolated and cultured using the Neomyts isolation kit (Cellutron, cat#: nc-6031). NRVM culture and proliferation studies were carried out as described previously.<sup>5</sup>

HL1 cells were obtained from William Claycomb and cultured as described.<sup>6</sup>

### ***Pik3cb* enhancer cloning and Luciferase activity measurements**

A 552 bp fragment of mouse *Pik3cb* genomic DNA was amplified with the following primers: 5'-AGTTTCCAATTTCCCCGTGG-3' and 5'-CTTAAATGTCAGTTGTTTCAGA-3'. The PCR product was then cloned into pGL basic vector. NRVMs were cultured in 24-well plates for luciferase assay. 500 ng/well of the indicated plasmids and 500 ng pRLTK internal control vector (Promega) were transfected with 1.25 µl Lipofectamine 2000 (Invitrogen), and medium was changed 4 hours after transfection. Luciferase activity was measured 24 hours after transfection using the Dual-Luciferase reporter assay system (Promega).

### **siRNA and shRNA**

A TriFECTa™ Dicer-Substrate RNAi kit (IDT) containing three siRNAs was used to knock down *Pik3cb* in NRVM. Four independent shRNAs against mouse *Pik3cb* were designed using a published algorithm<sup>7</sup>. The *Pik3cb* shRNAs were cloned into CAG-miR30-GFP plasmid to test the *Pik3cb* knock down efficiency in cultured MES13 cells. We then used a previously described method<sup>8</sup> to make AAV that simultaneously expressing Yap and *Pik3cb* shRNA. The sequences of the rat *Pik3cb* siRNAs and mouse *Pik3cb* shRNAs are listed in Online Table III.

### **AAV and adenovirus**

Adenovirus was generated using the AdEasy system.

3Flag-hYAP, Luciferase and 3Flag tagged human *Pik3cb* were separately cloned into ITR-containing AAV plasmid (Penn Vector Core P1967) harboring the chicken cardiac TNT promoter, to yield pAAV.cTnT::3Flag-hYAP and pAAV.cTnT::Luciferase, pAAV.cTnT::Pik3cb, respectively. The human Yap used in this study is a constitutive active version, which contains a Serine 127 Alanine mutation.<sup>9</sup> AAV was packaged using AAV9:Rep-Cap and pAd:deltaF6 (Penn Vector Cre) as described.<sup>10</sup>

AAV9 was packaged in 293T cells with AAV9:Rep-Cap and pHelper (pAd deltaF6, Penn Vector Core) and purified and concentrated by gradient centrifugation. AAV9 titer was determined by quantitative PCR.

## **Histology**

EdU was detected with the Click-iT EdU imaging kit (Life Technologies). Imaging was performed on a Fluoview 1000 confocal or a Nikon TE2000 epifluorescent microscope.

## **Informatics**

Reads were mapped using Bowtie<sup>11</sup> and peaks were called with Homer<sup>12</sup>. Motif analysis was performed with CompleteMotifs<sup>13</sup>.

## B. Supplemental References

1. Camargo FD, Gokhale S, Johnnidis JB, Fu D, Bell GW, Jaenisch R, Brummelkamp TR. YAP1 increases organ size and expands undifferentiated progenitor cells. *Curr Biol*. 2007;17:2054-60.
2. Jiao K, Kulesa H, Tompkins K, Zhou Y, Batts L, Baldwin HS, Hogan BLM. An essential role of Bmp4 in the atrioventricular septation of the mouse heart. *Genes Dev*. 2003;17:2362-7.
3. Agah R, Frenkel PA, French BA, Michael LH, Overbeek PA, Schneider MD. Gene recombination in postmitotic cells. Targeted expression of Cre recombinase provokes cardiac-restricted, site-specific rearrangement in adult ventricular muscle in vivo. *J Clin Invest*. 1997;100:169-79.
4. Tarnavski O, McMullen JR, Schinke M, Nie Q, Kong S, Izumo S. Mouse cardiac surgery: comprehensive techniques for the generation of mouse models of human diseases and their application for genomic studies. *Physiol Genomics*. 2004;16:349-60.
5. von Gise A, Lin Z, Schlegelmilch K, Honor LB, Pan GM, Buck JN, Ma Q, Ishiwata T, Zhou B, Camargo FD, Pu WT. YAP1, the nuclear target of Hippo signaling, stimulates heart growth through cardiomyocyte proliferation but not hypertrophy. *Proc Natl Acad Sci U S A*. 2012;109:2394-9.
6. Claycomb WC, Lanson NAJ, Stallworth BS, Egeland DB, Delcarpio JB, Bahinski A, Izzo NJJ. HL-1 cells: a cardiac muscle cell line that contracts and retains phenotypic characteristics of the adult cardiomyocyte. *Proc Natl Acad Sci U S A*. 1998;95:2979-84.
7. Park YK, Park SM, Choi YC, Lee D, Won M, Kim YJ. AsiDesigner: exon-based siRNA design server considering alternative splicing. *Nucleic Acids Res*. 2008;36:W97-103.
8. Jiang J, Wakimoto H, Seidman JG, Seidman CE. Allele-specific silencing of mutant Myh6 transcripts in mice suppresses hypertrophic cardiomyopathy. *Science*. 2013;342:111-4.
9. Zhao B, Wei X, Li W, Udan RS, Yang Q, Kim J, Xie J, Ikenoue T, Yu J, Li L, Zheng P, Ye K, Chinnaiyan A, Halder G, Lai ZC, Guan KL. Inactivation of YAP oncoprotein by the Hippo pathway is involved in cell contact inhibition and tissue growth control. *Genes Dev*. 2007;21:2747-61.
10. Grieger JC, Choi VW, Samulski RJ. Production and characterization of adeno-associated viral vectors. *Nat Protoc*. 2006;1:1412-28.
11. Langmead B, Trapnell C, Pop M, Salzberg SL. Ultrafast and memory-efficient alignment of short DNA sequences to the human genome. *Genome Biol*. 2009;10:R25.
12. Heinz S, Benner C, Spann N, Bertolino E, Lin YC, Laslo P, Cheng JX, Murre C, Singh H, Glass CK. Simple combinations of lineage-determining transcription factors prime cis-regulatory elements required for macrophage and B cell identities. *Mol Cell*. 2010;38:576-89.

13. Kuttippurathu L, Hsing M, Liu Y, Schmidt B, Maskell DL, Lee K, He A, Pu WT, Kong SW. CompleteMOTIFs: DNA motif discovery platform for transcription factor binding experiments. *Bioinformatics*. 2011;27:715-7.

## C. Online Tables

### Online Table I. Antibodies used in this study

| <b>Primary antibodies</b>   |                                 |                |                         |
|-----------------------------|---------------------------------|----------------|-------------------------|
| <b>Antigen</b>              | <b>Source</b>                   | <b>Species</b> | <b>Working dilution</b> |
| Cardiac troponin I (TNNI3)  | Abcam                           | Goat           | 1 to 200, IF            |
| Flag                        | Sigma                           | Rabbit         | 1 to 200, IF            |
| Luciferase                  | Abcam                           | Rabbit         | 1 to 200, IF            |
| GAPDH                       | Sigma                           | Mouse          | 1 to 200000, IB         |
| WGA-555                     | Invitrogen                      | NA             | 1 to 25, IF             |
| Pik3cb                      | Santa Cruz                      | Rabbit         | 1 to 1000, IB           |
| Phospho AKT S473            | CST                             | Rabbit         | 1 to 1000, IB           |
| AKT                         | CST                             | Rabbit         | 1 to 1000, IB           |
| p27                         | Santa Cruz                      | Rabbit         | 1 to 1000, IB           |
| YAP                         | CST                             | Rabbit         | ChIP                    |
| TEAD1                       | BD transduction<br>laboratories | Mouse          | ChIP                    |
| FLAG                        | Sigma                           | Mouse          | ChIP                    |
| Aurora B kinase             | Abcam ab2254                    | Rabbit         | 1 to 200, IF            |
| <b>Secondary antibodies</b> |                                 |                |                         |
| anti-goat Alexa488          | Invitrogen                      | Donkey         | 1 to 500, IF            |
| anti-goat Alexa647          | Invitrogen                      | Donkey         | 1 to 500, IF            |
| anti-rabbit Alexa555        | Invitrogen                      | Donkey         | 1 to 500, IF            |
| anti-rabbit HRP             | Invitrogen                      | Goat           | 1 to 10000, IB          |

## Online Table III. Primers and DNA oligo sequences used in this study

### Syber green primers

| Gene          | Species     | Forward                | Reverse                   |
|---------------|-------------|------------------------|---------------------------|
| <i>Ccna2</i>  | Mouse       | GCCTTCACCATTCATGTGGAT  | TTGCTCCGGGTAAAGAGACAG     |
| <i>CDC20</i>  | Mouse       | TTCGTGTTTCGAGAGCGATTTG | ACCTTGGAAGTAGATTTGCCAG    |
| <i>Aurka</i>  | Mouse       | GGGTGGTCGGTGCATGCTCCA  | GCCTCGAAAGGAGGCATCCCCACTA |
| <i>Myh6</i>   | Mouse       | CTCTGGATTGGTCTCCCAGC   | GTCATTCTGTCACTCAAACCTCTGG |
| <i>Yap</i>    | Mouse/Human | GACCCCTCGTTTTGCCATGAA  | ATTGTTCTCAATTCCTGAGAC     |
| <i>Cdkn1b</i> | Mouse       | GGCCTTCGACGCCAGACGTAA  | GCGCAATGCTACATCCAATGCTT   |
| <i>Igf1r</i>  | Mouse       | CTTTGCGAGAACCATGCCAG   | TAGACGGTTGAGTTTGGCCC      |
| <i>Pik3cb</i> | Mouse/rat   | GGGGAAGCGTGGGGCACATG   | AGGTCAGAGAGCGCCTCCCG      |
| <i>GAPDH</i>  | Mouse       | CAGGTTGTCTCCTGCGACTT   | GGCCTCTCTTGCTCAGTGTC      |
| <i>Pik3ca</i> | Mouse       | AAAATGACAAGGAACAGCTCCG | GCAGTACATCTGGGCCACTTC     |
| <i>Nkx2-5</i> | Mouse       | CCAAGTGCTCTCCTGCTTTCC  | CGCGCACAGCTCTTTTTTATC     |

### ABI Taqman probes accession number

|              |       |               |
|--------------|-------|---------------|
| <i>GAPDH</i> | Mouse | 4352339E      |
| <i>NPPA</i>  | Mouse | Mm01255747_g1 |
| <i>Myh7</i>  | Mouse | Mm00600555_m1 |

### ChIP Primers (Mouse)

|               |          |                      |                      |
|---------------|----------|----------------------|----------------------|
| <i>Pik3cb</i> | Enhancer | ACCTGCATTGCCACATAAT  | AGTGGCTCAGCAGGTAAGGA |
| <i>Pik3cb</i> | control  | CCTTGGCTGGCATTACTGAT | GCACTTAGCACAGCCTGACA |

### siRNA and shRNA target sequences

|                 |       |                           |                  |
|-----------------|-------|---------------------------|------------------|
| Neg.ctrl        | Rat   | CGTTAATCGCGTATAATACGCGTAT | siRNA            |
| <i>Pik3cb-1</i> | Rat   | GGAAGCAAGTTCACAATTACCCAAT | siRNA            |
| <i>Pik3cb-2</i> | Rat   | ACAAGAAATGATTGCCATAGAGGCT | siRNA            |
| <i>Pik3cb-3</i> | Rat   | CGATAAGATCATTGAGAAGGCAGCT | siRNA            |
| <i>Scramble</i> | Mouse | GCATAGTACGCATCGTGTAACAA   | Target for shRNA |
| <i>Pik3cb-1</i> | Mouse | CTGTGAAGATGCGTATCTGATTT   | Target for shRNA |
| <i>Pik3cb-2</i> | Mouse | TGTCGCATGGGTAAATACCATGG   | Target for shRNA |
| <i>Pik3cb-3</i> | Mouse | TCACACAGTACGGAAAGACTACA   | Target for shRNA |

## D. Online Figures

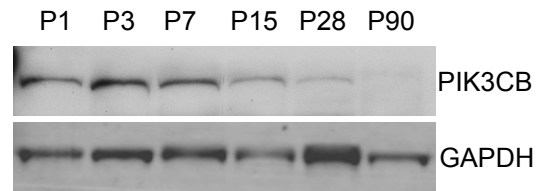

**Online Figure I. PIK3CB protein levels in normal postnatal mouse heart.** Total protein was extracted from wild type mouse hearts of different ages and analyzed for PIK3CB content by immunoblotting. GAPDH was used as loading control. P, postnatal day.



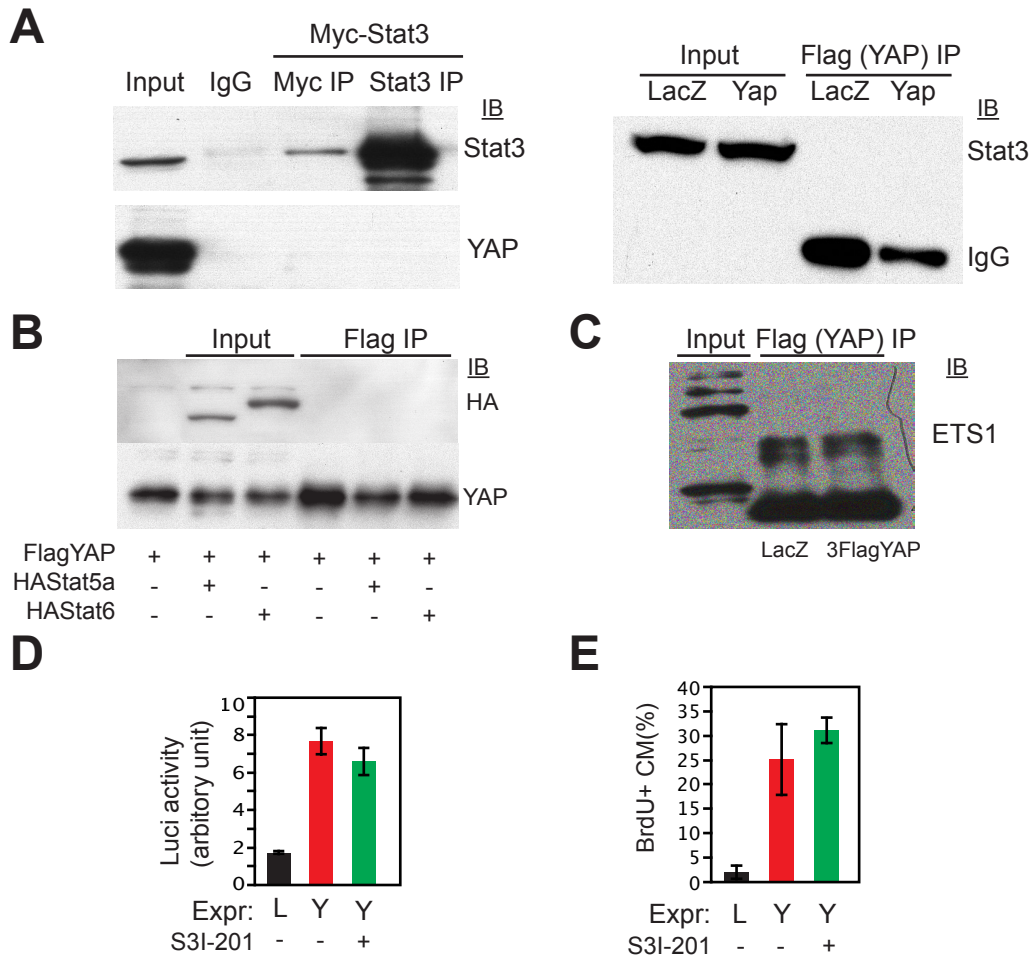

Lin et al.

**Online Figure II. YAP does not interact with ETS or STAT3a/Stat5/Stat6.**

**A-B.** Co-immunoprecipitation assay did not detect interaction between YAP and Stat3a, Stat5 or Stat6. Myc-Stat3, HA-Stat5a, HA-Stat6, or FLAG-YAP were overexpressed in 293 cells.

**C.** Flag-YAP does not interact with ETS in HL1 cells.

**D.** Luciferase assay. S3I-201, a Stat3 inhibitor, did not block YAP activation of the *Pik3cb* enhancer. NRVMs were transfected with LacZ (L) or YAP (Y) expression constructs and *Pik3cb* enhancer-luciferase reporter constructs.

**E.** BrdU incorporation assay. S3I-201 did not block YAP-induced cardiomyocyte DNA synthesis. NRVMs were transfected with adenovirus expressing LacZ (L) or YAP (Y).

**D-E,** n=3 for each group.

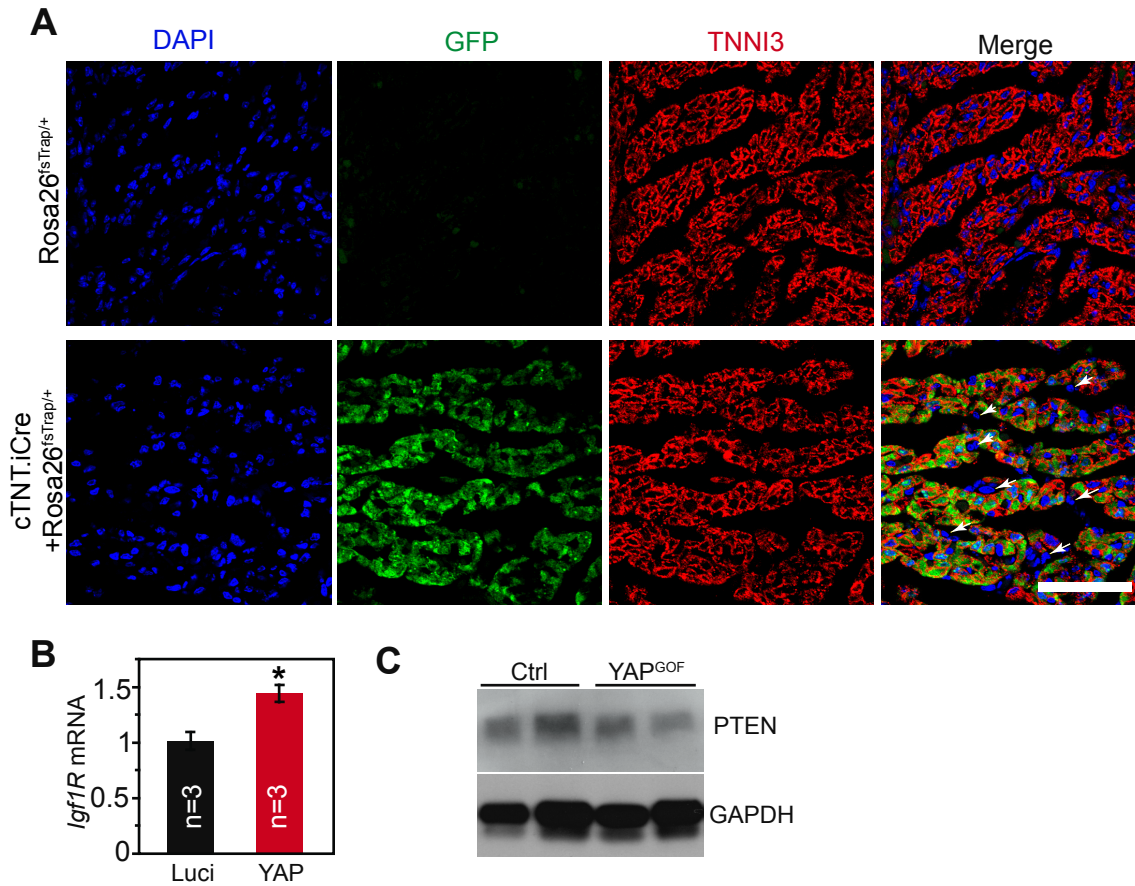

Lin et al.

**Online Figure III. AAV9-mediated overexpression of YAP.**

- A.** AAV9.cTNT selectively drives cargo expression in cardiomyocytes. Immunofluorescent staining of heart sections from Rosa26<sup>fsTRAP/+</sup> mice were treated at postnatal day 2 with AAV9.Luci or AAV9.cTNT.iCre. 6.5 days later, hearts were collected for analysis. AAV9:cTNT.iCre-activated GFP signals were detected in TNNI3 positive cardiomyocytes, but not in the TNNI3 negative non-cardiomyocytes (white arrows). Bar = 50  $\mu$ m.
- B.** qRT-PCR measurement of IGF1R expression level. Heart RNA from AAV9:Luci and AAV9:YAP transduced mice were used for testing IGF1R expression. **C.** Western blot of PTEN. Heart protein from adult Yap gain of function (YAP<sup>GOF</sup>) animals were used to test PTEN protein level. GAPDH was used as internal control.

**A**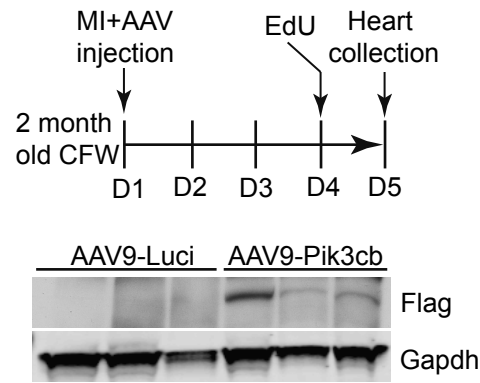**B**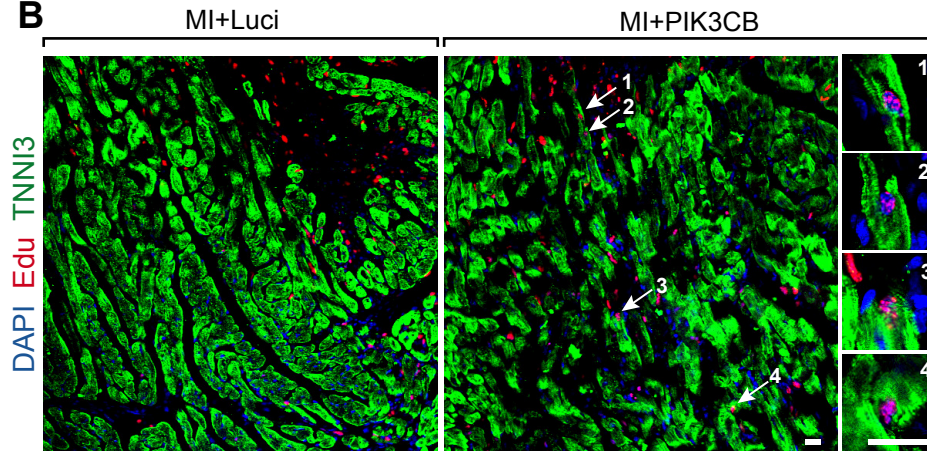**C**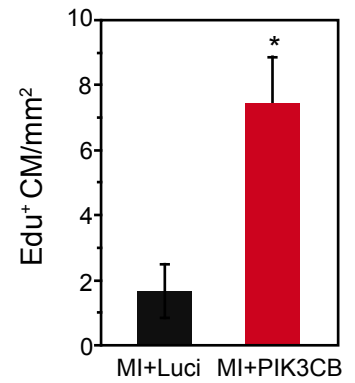**D**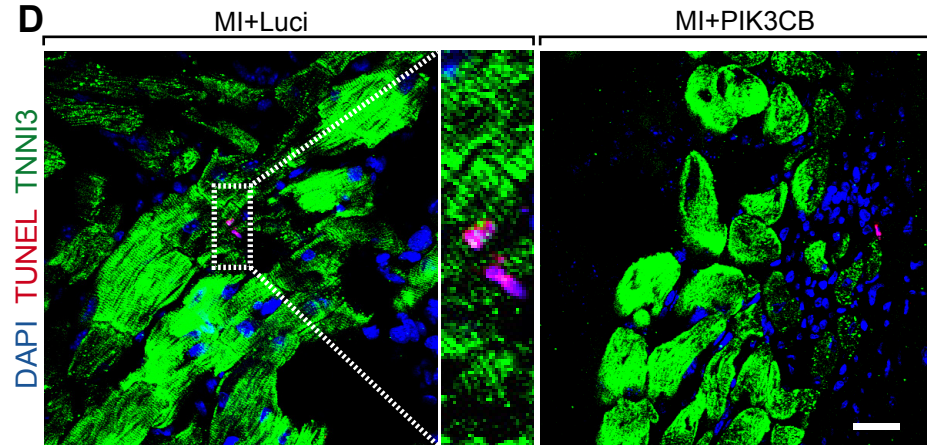**E**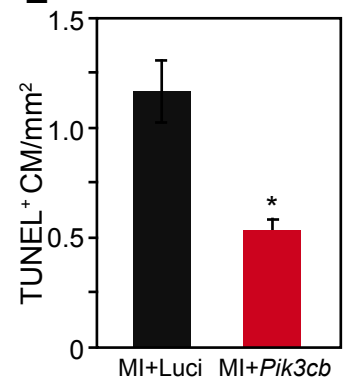**F**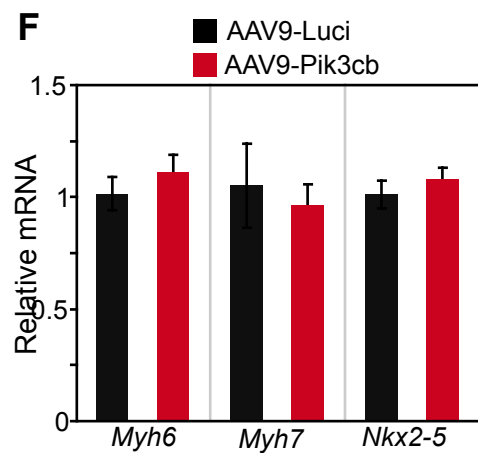**G**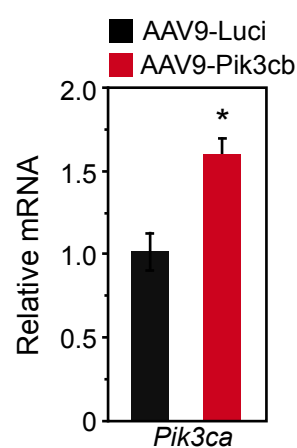**H**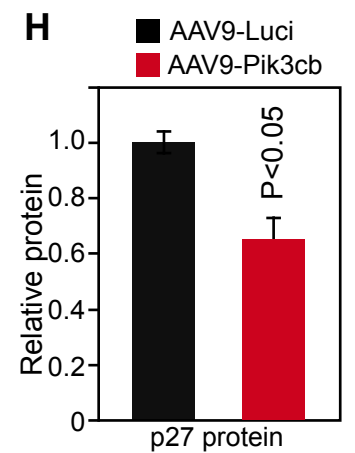

## Online Figure IV.

- A-E.** *Pik3cb* gain-of-function in adult cardiomyocyte proliferation in the context of myocardial infarction. A, upper panel, shows the experimental timeline. 2-month-old CFW mice underwent left anterior coronary artery ligation to produce an MI. AAV was injected into the myocardium immediately after coronary artery ligation. One dose of EdU was administered by intraperitoneal injection 4 days after MI. Lower panel shows immunoblot of Flag-PIK3CB expression in myocardium. GAPDH served as the loading control. B-C. Cardiomyocyte proliferation was measured by uptake of EdU. Arrows indicate EdU positive cardiomyocytes. Representative examples are magnified on the right. n=3. \*, P<0.05. D-E. Cardiomyocyte apoptosis was measured by TUNEL assay. Magnification shows representative TUNEL+ cardiomyocyte nuclei. n=3. \*, P<0.05. Bar=25  $\mu$ m.
- F.** qRT-PCR measurement of expression of sarcomere and cardiac progenitor gene expression. AAV9:Luci or AAV9:Pik3cb were administered subcutaneously to P2 neonatal mice. Total heart RNA were analyzed by qRT-PCR at P9. N=4. \*, P<0.05.
- G.** qRT-PCR measurement of *PIK3CA* mRNA. Samples were prepared as in F.
- H.** Quantitation of p27 protein levels, normalized to GAPDH. Samples were prepared as in F. The western blot is shown in Fig. 4K. n=3.

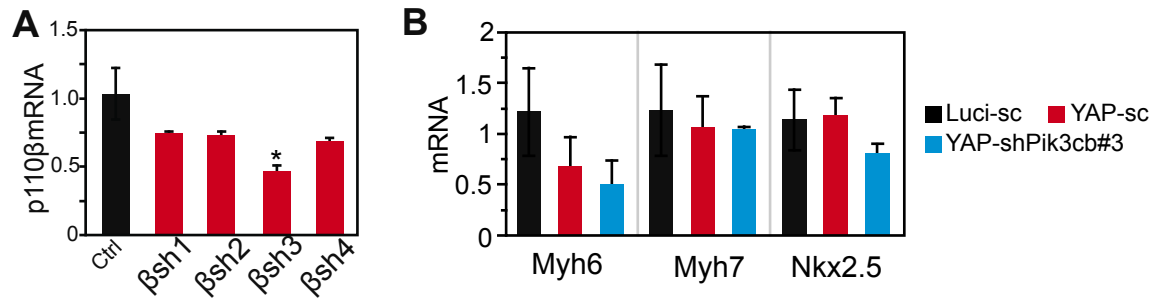

**Online Figure V. *Pik3cb* in vivo knockdown with shRNA. A.** qRT-PCR validation of mouse *Pik3cb* shRNA. MES13 cell line was transfected with indicated *Pik3cb* shRNAs. 3 days later, cells were collected for qRT-PCR analysis. **B.** qRT-PCR measurement of expression of sarcomere and cardiomyocyte progenitor gene expression. P1 mouse pups were transduce with indicated AAV. 9 days later, hearts were collected for qRT-PCR analysis. n=4. Groups were not significantly different.
